# Comparative transcriptomics reveals a conserved Bacterial Adaptive Phage Response (BAPR) to viral predation

Bob G. Blasdel<sup>1\*</sup>, Pieter-Jan Ceysens<sup>1†</sup>, Anne Chevallereau<sup>2</sup>, Laurent Debarbieux<sup>2</sup>, Rob Lavigne<sup>1\*</sup>

**\*For correspondence:**

[Robert.Blasdel@kuleuven.be](mailto:Robert.Blasdel@kuleuven.be) (BB);  
[Rob.Lavigne@kuleuven.be](mailto:Rob.Lavigne@kuleuven.be) (RL)

**Present address:** <sup>†</sup>National Reference Center for Tuberculosis and Mycobacteria, Scientific Institute of Public Health (WIV-ISP), Brussels, Belgium

<sup>1</sup>Laboratory of Gene Technology, KU Leuven, Leuven, Belgium; <sup>2</sup>Institut Pasteur, Molecular Biology of the Gene in Extremophiles Unit, Department of Microbiology, Paris, France

## Abstract

Intrinsic and acquired defenses against bacteriophages, including Restriction/Modification, CRISPR/Cas, and Toxin/Anti-toxin systems have been intensely studied, with profound scientific impacts. However, adaptive defenses against phage infection analogous to adaptive resistance to antimicrobials have yet to be described. To identify such mechanisms, we applied an RNAseq-based, comparative transcriptomics approach in different *Pseudomonas aeruginosa* strains after independent infection by a set of divergent virulent bacteriophages. A common host-mediated adaptive stress response to phages was identified that includes the *Pseudomonas* Quinolone Signal, through which infected cells inform their neighbors of infection, and what may be a resistance mechanism that functions by reducing infection vigor. With host transcriptional machinery left intact, we also observe phage-mediated differential expression caused by phage-specific stresses and molecular mechanisms. These responses suggest the presence of a conserved Bacterial Adaptive Phage Response mechanism as a novel type of host defense mechanism, and which may explain transient forms of phage persistence.

## Introduction

*Pseudomonas aeruginosa* is a ubiquitous Gram-negative soil organism which thrives in diverse humid environments and acts as an opportunistic pathogen. Around 8% of its unusually large and complex genome is predicted to encode transcriptional regulators and two-component regulatory systems, allowing it to rapidly adapt to changing conditions (Stover *et al.*, 2000). Recently, by analyzing the transcriptomes of the *P. aeruginosa* PA14 type strain under 14 different environmental conditions, Dötsch *et al.* (2015) were able to precisely define the parameters and context of *P. aeruginosa* transcription. Indeed, they found that while only 24-46% of gene features are active within each environmental condition that they tested, nearly all gene features were active in at least one.

Bacteriophages (phages) are a dominant force in the control of microbial communities and typically outnumber their bacterial hosts by tenfold. Phage predation accounts for a significant proportion of bacterial mortality, up to 80% in some systems (Rohwer *et al.*, 2009), and thus presents a remarkably strong source of selective pressure for bacterial immunity systems. Known bacterial immunity systems can be divided into categories analogous to either intrinsic or acquired

antimicrobial resistance systems as denoted by *Arzanlou et al. (2017)*. Indeed, a wide variety of phage defense systems have been found that are analogous to intrinsic mechanisms of antimicrobial resistance, where bacteria constitutively express systems that mediate phage resistance, such as Restriction/Modification systems (*Tock and Dryden, 2005*), Toxin/Anti-toxin systems (*Dy et al., 2014*), and the Bacteriophage Exclusion (BREX) system (*Goldfarb et al., 2015*). Similarly a great diversity of phage immunity systems analogous to acquired antimicrobial resistance systems, where bacteria acquire genetic material that engenders resistance to phages, have been found such as prophage homoimmunity (*Adams et al., 1959*), DNA-guided DNA interference by prokaryotic Argonaute (*Swarts et al., 2014*), and CRISPR/Cas-mediated interference (*Marraffini, 2015*). However, to date, it has been unclear to what extent bacteria might possess immunity mechanisms analogous to adaptive antimicrobial resistance systems, where bacteria would recognize a phage threat and express a stress response to phage predation that would protect either the infected cell or its nearby kin.

As true parasites, phages rely heavily on their host cell mechanisms for their reproduction. When an obligately lytic phage injects its genome into the cytoplasm of a bacterial host, a molecular battle for dominance over the cell ensues as phage mechanisms attempt to convert the host to a viral metabolism conducive to phage production, while the host mechanisms work to exclude or inhibit viral propagation. Lacking the ability to produce a temperate lifecycle, infection by obligately lytic phages typically results in cell death and either successful or unsuccessful propagation of the phage. Many have assumed that one of the primary ways in which phage dominate their hosts during a lytic life cycle is to eliminate host transcription and transcripts, based on the example of T4 (*Kutter et al., 1994*). However, our recent investigations have shown that *Pseudomonas aeruginosa* phages PAK\_P3 and  $\Phi$ KZ respectively appear to direct the upregulation of an operon involved in host mRNA stability (*Chevallereau et al., 2016*) and prompt the transcriptional mobilization of a prophage (*Ceyssens et al., 2014*). At the same time, *Howard-Varona et al. (2016)* have demonstrated that the genomes of two different *Cellulophaga baltica* strains were differentially expressed in unique ways during  $\Phi$ 38:1 phage infection, hinting at the existence of diverse transcription-level stress responses to the one phage examined. However, it has thus far been impossible to tease apart which effects on the stability and expression of host transcripts during infection are phage-mediated and which effects are prompted by the host in response to phage stress. During phage infections where the expression of host genetic information is indeed being meaningfully differentially regulated, it thus becomes imperative to distinguish whether the virus or the host within the cell is directing that differential expression in order to meaningfully understand it.

Here we performed RNA-Seq on independent infections of *P. aeruginosa* by divergent obligately lytic phages and define the host stress response to phage infection by identifying the genes that are differentially expressed in common. This isolates the transcriptional impact of the host mechanisms responding to phage infection that all of these phage infections have in common. Indeed, identifying genes differentially expressed during all of the phage infections will distinguish this from host regulatory responses to stresses imposed by specific viral metabolisms *De Smet et al. (2016)* as well as the transcriptional impact of phage-specific molecular mechanisms (*Ceyssens et al., 2014*). Our ability to putatively assign the agency behind differential expression to either host or phage has allowed us to describe a plethora of fundamentally novel adaptive host systems for defending against phage predation. This includes the well-studied PQS metabolite, a quorum sensing compound (*Diggle et al., 2003, 2007*). *Häussler and Becker (2008)* have previously proposed that the dual nature of PQS, as a pro-oxidant and a regulator with the ability to promote a protective anti-oxidative response, may be involved in rescuing healthy members of the community from oxidative stress while promoting the destruction of unhealthy sister cells whose survival would reduce the fitness of the micro-colony as a whole. However, our results suggest that it also functions as a phage defense warning capable of mediating phage resistance. Our results also demonstrate that, unlike *T4virus* members that have long been demonstrated to shut off host gene expression in immediate-early infection (*Koerner and Snustad, 1979*), many *Pseudomonas* phages maintain

**Table 1.** None of the five phage infecting PAO1 described here share any gene products to any other phage, based on sequence-based similarity (*De Smet et al., 2016*), while the relationship of PAK\_P3 to PAK\_P4 is described by *Blasdel et al. (2017)*. Data for all phage save ΦKZ was sequenced from cDNA library preparations that were strand specific, allowing for sense transcripts to be counted independently of antisense transcripts.

| Phage Name | Genus               | Genome Size | Latent Period | Stranded Library | Primary Host | RNA-Seq Data                    |
|------------|---------------------|-------------|---------------|------------------|--------------|---------------------------------|
| LUZ19      | <i>Phikmvirus</i>   | 43kb        | 24 min        | YES              | PAO1         | This publication                |
| YuA        | <i>Yuavirus</i>     | 58kb        | 80 min        | YES              | PAO1         | This publication                |
| PEV2       | <i>N4virus</i>      | 72kb        | 35 min        | YES              | PAO1         | This publication                |
| 14-1       | <i>Pbunavirus</i>   | 66kb        | 15 min        | YES              | PAO1         | This publication                |
| ΦKZ        | <i>Phikzvirus</i>   | 280kb       | 60 min        | NO               | PAO1         | <i>Ceyssens et al. 2014</i>     |
| PAK_P3     | <i>Kpp10virus</i>   | 88kb        | 18 min        | YES              | PAK          | <i>Chevallereau et al. 2016</i> |
| PAK_P4     | <i>Pakpunavirus</i> | 93kb        | 13 min        | YES              | PAK          | <i>Blasdel et al. 2017</i>      |

the host regulatory apparatus - challenging this long-standing paradigm. Thus we are also able to postulate that, at least some phage manipulate the genetic wealth encoded by the host towards phage ends, exploiting the host genome as if it were an auxiliary phage genome.

## Results and Discussion

### A diverse library of obligately lytic phages

RNA Sequencing was performed on infections of *P. aeruginosa* PAO1 by divergent phages that are completely devoid of genomic synteny or even genome similarity. Samples were collected at time points chosen to represent early, middle, and late infection, using the well established T4 model as a guide (*Miller et al., 2003*), as well as phage negative controls (Samples outlined in Supplementary Table 2). The phages outlined in Table 1 each co-opt host mechanisms in radically different ways and have unique impacts on the abundance of host metabolites (*De Smet et al., 2016*). As a result, they are unlikely to all mediate differential expression of the same host genes in the same way.

Within the infections of the seven phages with RNA-Seq data discussed here, there is a great diversity of impacts on the abundance of phage transcripts relative to host transcripts as shown in Figure 1. Indeed, at one extreme, PAK\_P4 (*Blasdel et al., 2017*) can be observed to produce 84% of all the transcripts in the cell after 3.5 minutes while at the other end YuA produces less than 5% even until late infection. Some phages such as PAK\_P3 appear to replace host transcripts at a constant rate (*Chevallereau et al., 2016*), while others appear to slowly accelerate the replacement such as LUZ19 and ΦKZ, and others such as 14-1 and YuA appear to have a sudden impact at a specific point in the middle of infection. These different impacts appear to instead reflect fundamentally different relationships between the studied phages and the transcriptomes of the host as well as fundamentally different RNA nucleotide metabolisms.

### The putative PAO1 stress response to phage distinguished from phage-mediated impacts

To define the putative host-mediated *P. aeruginosa* PAO1 stress response to phage infection, we compared strand-specific RNA-Seq data representing independent infections by four divergent phages (LUZ19, YuA, PEV2 and 14-1) in the core analysis (See Figure 2), identifying gene features that were differentially expressed in common. This possible stress response to phage infection, which differentially expresses 5.5% of the coding sequences present in *P. aeruginosa* PAO1, contains a number of systems that appear to be involved in hindering phage infection. Indeed, these include an indication of increased Hfq activity through the depletion of the CrcZ sRNA (See Appendix Box 1), a quorum sensing-based phage defense system, and a form of reduced infection vigor. Additional features are highlighted in Appendix 1. However, this putative host-mediated stress response

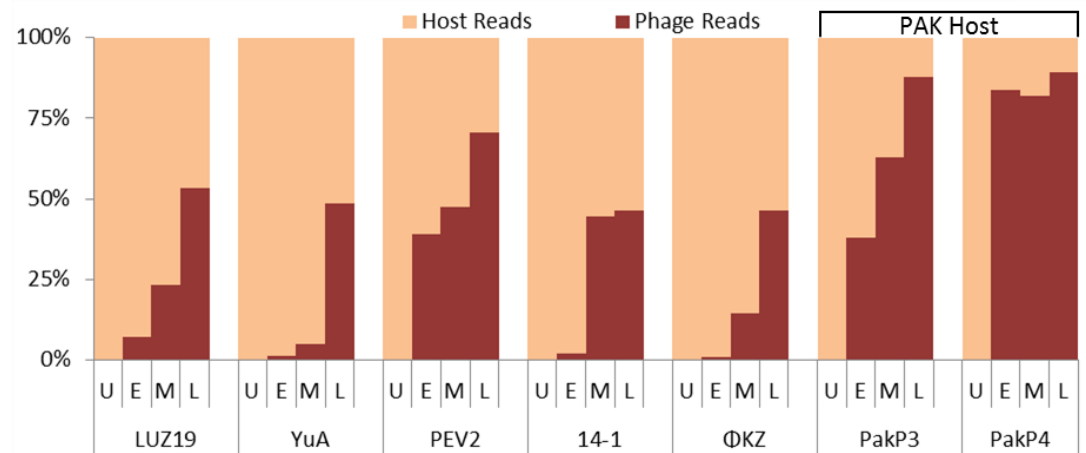

**Figure 1. Reads aligning to phage genomes over the course of infection.** Shown here is the percentage of reads that map to the phage genome when compared to the total non-ribosomal RNA reads that map to either the phage or host genome. This proportion ends up representing the relative mass of non-ribosomal RNA present in the cell. Also shown for comparison are reads harvested from previously published data for ΦKZ, PAK\_P3 (Chevallereau *et al.*, 2016), and PAK\_P4 (Blasdel *et al.*, 2017).

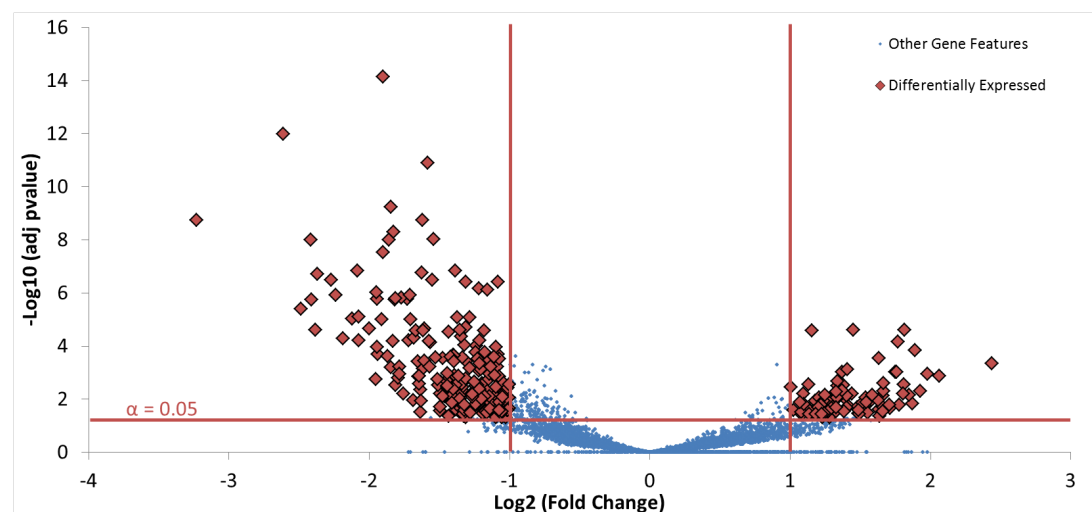

**Figure 2. Defining the host response.** This volcano plot shows gene features that can be considered differentially expressed ( $\text{Log}_2$  Fold Change  $>1$  or  $<-1$ , and adj pvalue  $< 0.05$ ) between the phage negative control and the late infections of phages LUZ19, YuA, 14-1, and PEV2 considered as a single condition. This highlights a putative host-mediated stress response to phage infection that is independent of phage-mediated manipulation of host gene expression.

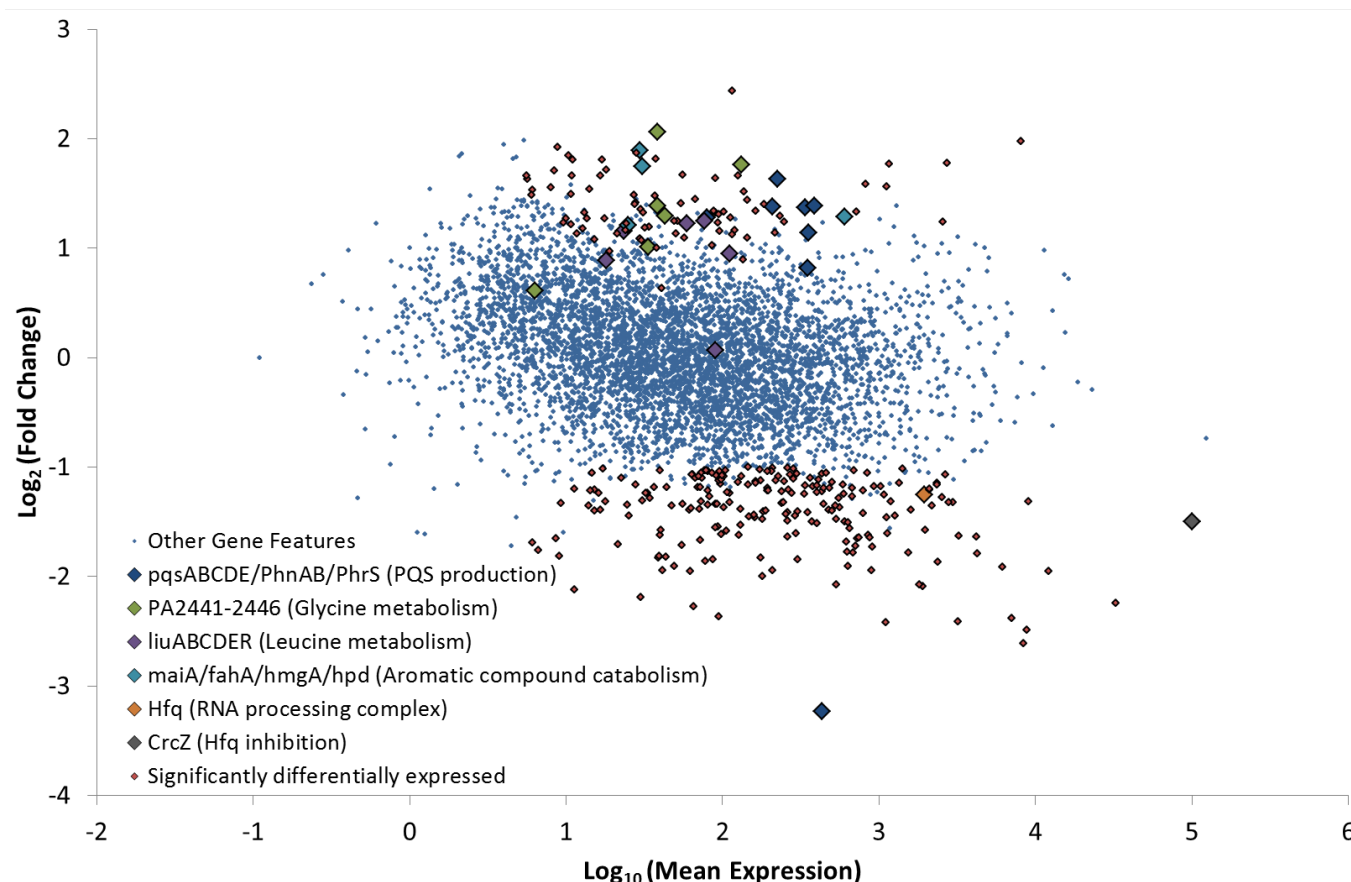

**Figure 3. MA Plot highlighting the operons that are differentially expressed in common between infections.** By considering samples representing the abundance of host transcripts during the late infections of phages LUZ19, YuA, PEV2 and 14-1 as a single condition and comparing it to a condition representing the phage-negative control, we are able to describe genes that are differentially expressed in common between infections.

**Figure 3-Figure supplement 1. The differential expression of host genes during infection by each phage are examined here individually.** Gene features identified as differentially expressed by the putative host-mediated stress response are highlighted in each individual phage infection as red, while gene features that are differentially expressed by each phage but not the common host response are highlighted as yellow. The differential expression of the putative host-mediated stress response appears to be weaker in LUZ19 than in other phage, though this could be explained by the activity of LUZ19 gp25.1, a T7 gp2-like transcriptional inhibitor (*Klimuk et al., 2013*) in middle infection.

is notably absent during infection by  $\Phi$ KZ (*Ceyssens et al., 2014*) while the transcripts that are degraded during other infections persist.

The Pseudomonas Quinolone System is upregulated in response to phage infection. One of the most remarkable components of the host-mediated stress response to phage infection is the transcriptional upregulation of the pqsABCDE operon, as well as the co-regulated phnAB operon, which are both necessary for the formation of the Pseudomonas Quinolone Signal (PQS) (*Gallagher et al., 2002; Palmer et al., 2013*). As one of the two primary functions of the PQS metabolite appears to be as a transcriptional regulator, upregulating stationary phase expression and the oxidative stress response, we compared our data to the differential expression of Coding Sequences found by *Rampioni et al. (2010)* to be regulated by PQS (See Figure 4). Our results suggest that rather than serve as just a warning of oxidative stress (*Häussler and Becker, 2008*), the PQS family of compounds could also function as a warning of coming phage infection. This would help explain the results of *Moreau et al. (2017)*, who found that a PQS quorum-signaling proficient strain of *P. aeruginosa* was able to evolve higher levels of resistance to phages during a short-term selection

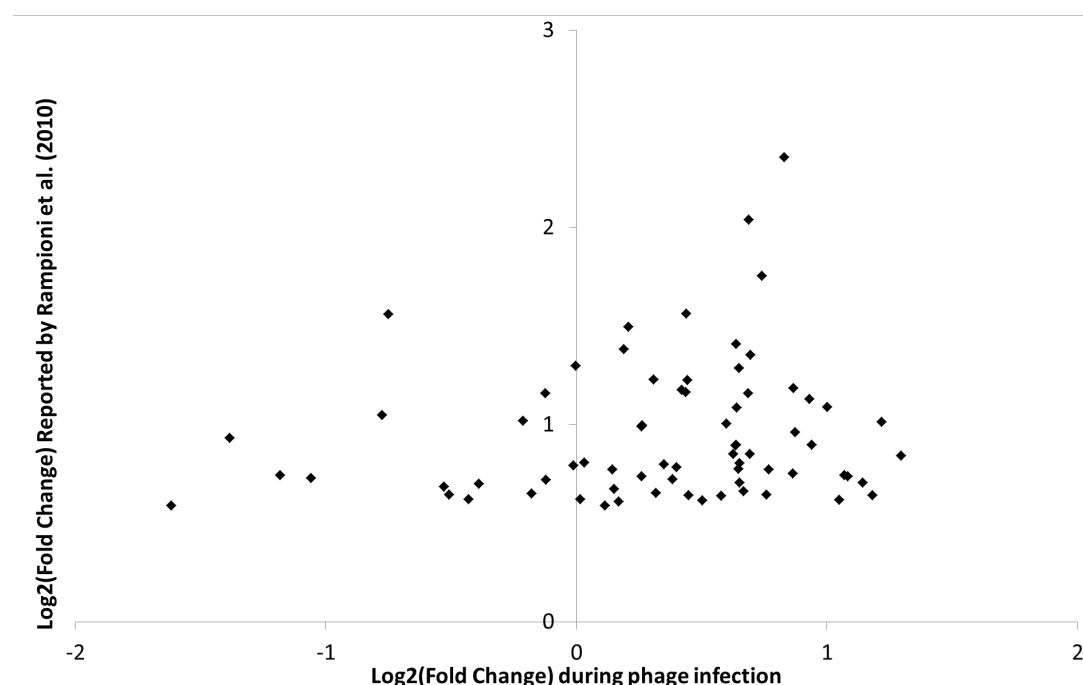

**Figure 4. Gene features differentially expressed by PQS.** The gene features found by *Rampioni et al. (2010)* to be upregulated in a  $\Delta pqsA$ - mutant defective in the PQS system are also inversely differentially expressed after infection by *Pseudomonas* phages, indicating that phage infection induces a PQS mediated response.

experiment. Indeed, the PQS quorum sensing system could work as a host defense against phages by shutting down the metabolisms of not yet infected cells and weakening or killing phage-infected cells that lack the ability to transcriptionally respond to its toxic effect. While neither effect could plausibly save a cell that has received the chemical signal with any reasonable frequency, both could substantially reduce burst sizes or prevent productive infection, impacting the success of the phage and its propagation within the host community.

This model presents a fascinating example of the power of kin selection to drive the evolution of traits with no direct benefit to the organism that the traits are active in. Indeed, no matter how strong the production of the PQS signal is in a *Pseudomonas* cell, by functioning as a toxin the system would seem unlikely to save an infected cell and allow it to recover as a colony forming unit. Similarly, this system would not seem to provide much benefit to the cell's mostly clonal sisters in its micro-colony, which would still stand a high chance of being killed anyway in spite of the chemical warning to shut down metabolism and produce the oxidatively toxic PQS signal to harm infected cells unable to transcriptionally respond. Instead, the most significant benefit of maintaining a PQS system able to warn a micro-colony of impending phage attack would be to neighboring micro-colonies. In addition to being upregulated on a transcriptional level, we have previously found that PQS metabolites, as well as precursors, have been shown to increase in abundance as determined by whole cell mass spectrometry. This has been found within cells infected by most but not all phages (*De Smet et al., 2016*). This suggests that some of the phages with successful infections that were examined, both here and by *De Smet et al. (2016)*, may possess phage-encoded inhibitors that prevent PQS production on a post-transcriptional level while others may have mechanisms causing the host cell to be insensitive to its effect.

#### Amino acid catabolism is upregulated in response to phage infection

Phage infection appears to upregulate the production of transcripts for PA2441-2446, which are involved in the glycine cleavage system. This operon is under the control of GcsR (PA2449), which is not differentially expressed on a transcriptional level. However, GcsR activity does indeed appear to



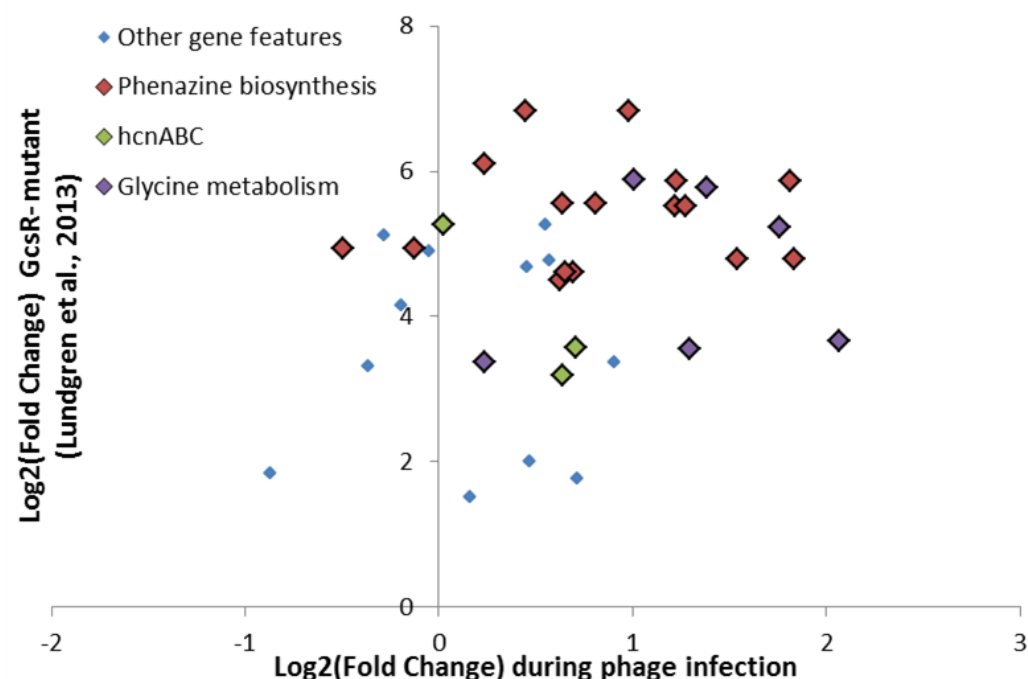

**Figure 5. Gene features differentially expressed by GcsR.** The gene features found by *Lundgren et al. (2013)* to be upregulated in a  $\Delta$ GcsR- mutant defective in the Glycine cleavage system are also inversely differentially expressed after infection by *Pseudomonas* phages, indicating that phage infection induces a GcsR mediated response.

be induced by the host during phage infection (See Figure 5). The glycine cleavage system forms a metabolic pathway that converts glycine into pyruvate to power central metabolism, which must be tightly regulated (*Kikuchi, 1973; Sarwar et al., 2016*). The host may be post-transcriptionally activating GcsR so as to specifically over-regulate the transcription of the glycine cleavage system during infection, above the level that was previously expressed under phage-free conditions in the experimental flask.

Another four coding sequences, MaiA/FahA/HmgA and hpd, related to tyrosine/phenylalanine and leucine catabolism are also upregulated by the host. According to the *Pseudomonas* Genome Database, this pathway is predicted to encode for a 4-hydroxyphenylpyruvate dioxygenase (hpd) homogentisate-1,2-dioxygenase (HmgA), maleylacetoacetate isomerase (MaiA), and fumarylacetoacetase (FahA), which process the p-hydroxyphenylpyruvate precursor for tyrosine and phenylalanine into acetoacetate and fumarate (*Winsor et al., 2016*). However, this activation does not appear to be similar to the ordinary transcriptional response to additional phenylalanine and tyrosine (*Palmer et al., 2010*). The stress response similarly upregulates the *liuRABCDE* cluster, which converts leucine into acetoacetate for injection into central metabolism (*Aguilar et al., 2006*).

These genes involved in amino acid catabolism appear to be used as part of a 'Scorched Earth' strategy for reducing the vigor of infection, disrupting phage propagation without necessarily excluding it in a fashion first postulated by *Hyman and Abedon (2010)*. As *De Smet et al. (2016)* showed, *P. aeruginosa* phages generally appear to consistently deplete amino acid metabolites indicating that their abundance may be a major limiting factor in the success of phage infections. Indeed, this aspect of phage infection may be a particularly vulnerable target for the dying host to attack. Successful abortive infection may not require special or exotic Toxin/Anti-toxin systems (*Forde and Fitzgerald, 1999; Chopin et al., 2005; Snyder, 1995*), but could potentially simply involve the host disrupting the metabolic health of the cell in a way that the infected cell would have a hard time recovering from.

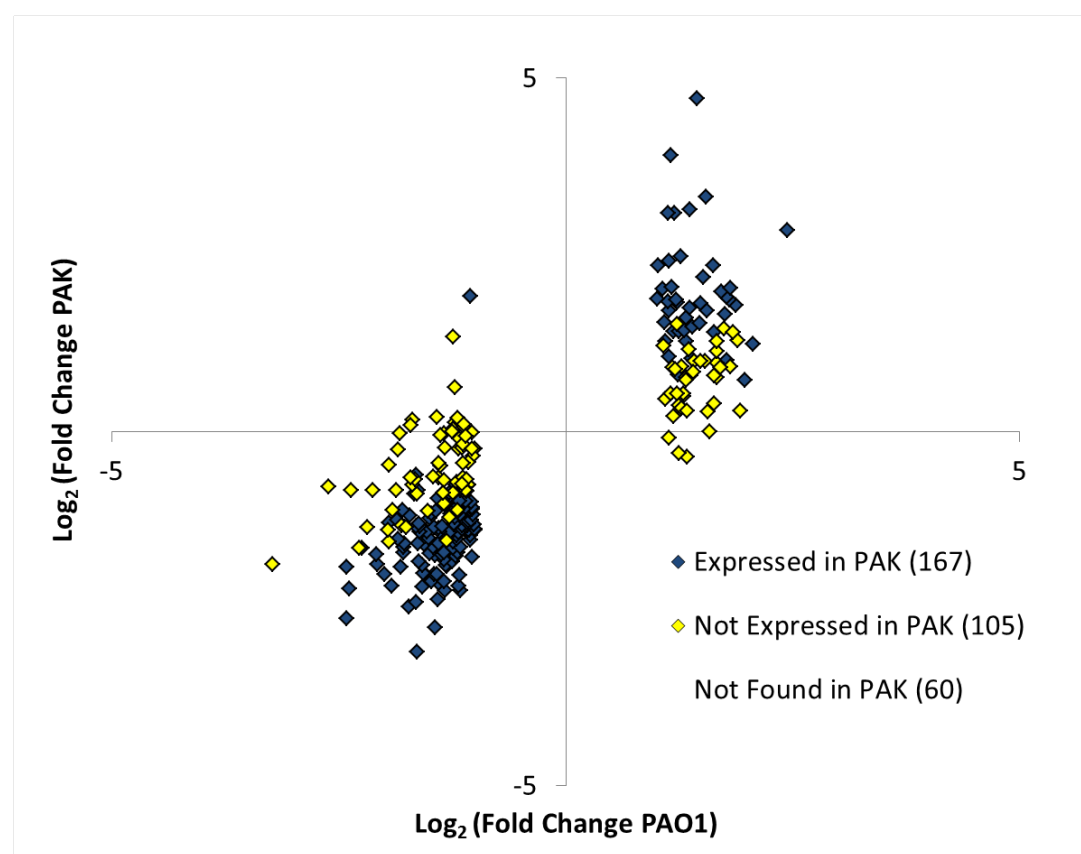

**Figure 6. Coding sequences of the *P. aeruginosa* PAO1 stress response identified in *P. aeruginosa* PAK.** Nearly half of the PAK coding sequences orthologous to genes used in the PAO1 phage stress response as identified by BBH were also differentially expressed during infection by PAK\_P3 and PAK\_P4 (Blasdel et al., 2017).

### Conservation of the PAO1 host response in PAK

Data from RNA-Seq experiments that had been previously published for infections of PAO1 by  $\Phi$ KZ (Ceyssens et al., 2014) and infections of *P. aeruginosa* PAK by PAK\_P3 (Chevallereau et al., 2016) and PAK\_P4 (Blasdel et al., 2017) were also reanalyzed. With the host-mediated transcriptional stress response used by *P. aeruginosa* PAO1 during infection by various phages identified, it then became possible to assess whether this same stress response was used by *P. aeruginosa* PAK during infection by phages PAK\_P3 and PAK\_P4 (Blasdel et al., 2017). To accomplish this, coding sequences in *P. aeruginosa* PAK that were orthologous to the genes used by *P. aeruginosa* PAO1 to respond to phage infection were first identified by the Best Bi-directional Hit (BBH) method. Of the *P. aeruginosa* PAO1 coding sequences that are differentially expressed in response to phage infection, just over half could be identified in *P. aeruginosa* PAK and shown to be differentially expressed during infection by phages PAK\_P3 and PAK\_P4. Of the remaining half, 2/3s were not differentially expressed and 1/3 had no BBH (See Figure 6). Specifically, the PQS system was found to be unregulated in PAK while CrcZ and Hfq were found to be downregulated, suggesting that both may function in conserved ways (See Appendix Box 1). At the same time, coding sequences involved in amino acid catabolism were not found to be differentially expressed.

### Phage-mediated differential expression of the host genome

Having defined the host-mediated stress response to phage infection, we can set it aside to look specifically at each of the other gene features differentially expressed during each of the individual phage infections. Remarkably, while each phage manipulates between 4.8% and 8.0% of host gene



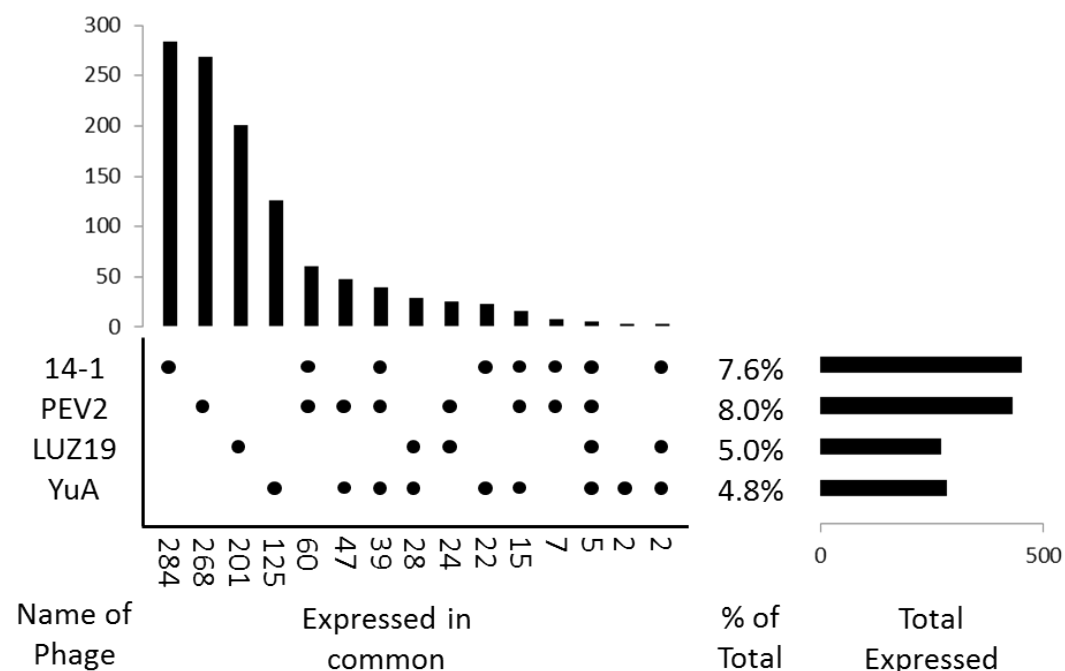

**Figure 7. Number of host gene features that are differentially expressed during infections by each combination of phage(s) excluding the host response.** We find that each phage has a mostly unique impact on host transcription.

features (Log2 fold change >1.3, adj pvalue <0.05), 20% are manipulated by at least one of the four phages, indicating a wide diversity of strategies for co-opting the functions of host gene features. Indeed, within this 20%, 78% are manipulated by just one phage. Additionally, out of the total number of gene features that are significantly expressed during more than one phage infection, 56% are significantly differentially expressed in the analysis designed to highlight the host-mediated response.

We have found that all but one of the *Pseudomonas aeruginosa* phages studied here manipulate expression of the host genome during infection, while simultaneously allowing the host to transcriptionally respond to the phage. Therefore we observe a mixture of two kinds of differential expression of host genes that could each be described as phage-mediated: (i) activation of various kinds of stress responses to metabolic and environmental stresses that the phage imposes (indirect phage manipulation) and (ii) induction of differential expression of targeted parts of the host genome through phage-borne molecular mechanisms (direct phage manipulation). At the same time, the implications of this finding are more concretely interpretable with an understanding of phage biology that centers on the phage-infected cell rather than on the inert viral particle, as in the virocell model (Forterre, 2011, 2013). Indeed, this shift in perspective, which would see the phage-infected cell as a living entity that is propagated by its particles, would allow us to posit that the genome of host origin within the infected *P. aeruginosa* cell can function as a second, auxiliary, phage genome for at least many phages.

#### Phage PhiKZ inhibits all differential expression of host transcripts

Phage ΦKZ is an unusually large (280kb) myovirus infecting *P. aeruginosa* that was previously understood to encode 306 coding sequences (Mesyanzhinov et al., 2002), later updated to 369 based on RNA-Seq data (Ceyssens et al., 2014). Recently, Ceyssens et al. (2014) demonstrated that ΦKZ can infect its host, expressing three separate phases of transcription, completely independently of the action of the host RNA polymerase. Indeed, they found that ΦKZ proceeds in the presence

**Table 2. Prophage elements induced during infections by various phages.** Of the seven phage infections examined in this manuscript, three promote the transcription of a prophage within *P. aeruginosa* PAO1 or PAK, two promote the transcription of part of one prophage, and two do not promote prophage transcription.

| Phage  | Prophage  | Locus Tag         | Amount Upregulated     |
|--------|-----------|-------------------|------------------------|
| LUZ19  | Defective | PA0616-PA0648     | 11/33 Coding Sequences |
| YuA    | N/A       | N/A               | N/A                    |
| PEV2   | Pf4-like  | PA0717-PA0728     | 5/14 Coding Sequences  |
| 14-1   | N/A       | N/A               | N/A                    |
| ΦKZ    | Pf4-like  | PA0717-PA0728     | 4.1 Fold Change        |
| PAK_P3 | P2-like   | PAK_6278-PAK_6305 | 2.5 Fold Change        |
| PAK_P4 | P2-like   | PAK_6278-PAK_6305 | 4.2 Fold Change        |

of high concentrations of rifampin, which acts as a powerful inhibitor of all host transcription by inactivating the host RNA polymerase. This independence was then concretely demonstrated by *Yakunina et al. (2015)* to result from the action of two enzymes with RNA polymerase activity, one which is packaged into the virion and co-injected with ΦKZ DNA to power early transcription (vRNAP), while the other is encoded by middle transcripts and powers late transcription (nvRNAP).

Unlike each of the other phages examined here (See Supplementary Table 1), ΦKZ infection does not appear to either prompt the host-mediated response to phage infection or mediate phage-specific differential expression of the host genome. Indeed, the genes identified as being upregulated as part of the host-mediated response to other phages are not significantly differentially expressed and there do not appear to be any host genes that are upregulated uniquely by ΦKZ. Similarly, the differential degradation of host transcripts by either entity within the cell appears to be completely disrupted by 10 minutes into infection. The only exception to this is the transcriptional activation of a Pf1-like prophage, which appears to recruit the ΦKZ early transcriptional apparatus. This suggests that ΦKZ encodes for an immediate-early inhibitor that prevents host transcription in addition to gp37, which is known to inhibit the host RNA degradosome (*Van den Bossche et al., 2016*). Thus ΦKZ, like the *Tevenvirinae* are already known to do (*Uzan, 2009; Doron et al., 2016*), may have made an evolutionary tradeoff whereupon they make themselves insensitive to any adaptive phage defenses that the host may use, but in exchange also render all of the other stress responses and genetic information encoded by the host useless to them. ΦKZ is notably one of the two largest phages assessed here, suggesting that larger phages like it and the *Tevenvirinae*, that encode a large number of genes could potentially adapt more easily to not requiring the information encoded by the host.

## Unsuccessful induction of prophage transcription

Of the seven phages examined here, five induce the transcription of a prophage element within the *P. aeruginosa* PAO1 or *P. aeruginosa* PAK hosts. Two of these five prophage inductions appear to conspicuously fail as only a third of each prophage element's coding sequences is differentially expressed before the end of infection (i.e. in LUZ19 and PEV2-infected cells). Of the remaining three, ΦKZ as been previously demonstrated to fail to fully mobilize the P1-like prophage element encoded by PAO1 as *Ceyssens et al. (2014)* showed that the element does not replicate its own genome. Similarly, as was reported by *Chevallereau et al. (2016)* and *Blasdel et al. (2017)* respectively, PAK\_P3 and PAK\_P4 both appear to fail to fully mobilize the P2-like prophage element encoded by PAK. Indeed, they have shown that in both cases the upregulation of the prophage element relative to other host transcripts does not outpace the more global replacement of host transcripts with phage transcripts leading them to be ultimately downregulated relative to the total transcript population in the infected cell (See Table 2).

## Conclusions

While it has been long established that T4 both shuts off the transcription and translation of all host gene features (Koerner and Snustad, 1979; Black et al., 1983; Kutter et al., 1994), and that T5 so thoroughly degrades host DNA that it is implausible that any is transcribed during infection, it has previously been unclear if this exclusion of host transcription is universal or even common. Indeed, Schachtele et al. (1972) demonstrated through radioactive experiments that most transcripts produced during  $\Phi$ 29 infection of *Bacillus subtilis* originate from the host, suggesting that they may play a role in infection without being able to indicate what that role might be. There are clear benefits to the phage in shutting off the host's ability to mount a stress response on a transcriptional level. By leaving host mechanisms able to detect and respond to infection through adaptive processes, a phage would leave itself vulnerable to unpredictable host-mediated interference. However, not only would this inactivation inhibit host defense responses that rely on gene expression, but it would also serve to exclude the expression of other competing selfish genetic elements within the cell that might interfere with productive infection such as prophages, competing phage particles, and plasmids. At the same time, the potential benefits to allowing the host to transcriptionally respond to stress are also significant. Phages that allow the host transcriptional system to remain intact at least on some level could manipulate host stress responses directly with phage machinery, as well as indirectly through phage-induced stress, and thus adapt the cell to phage specific conditions. We have observed that four out of five examined phages that infect *P. aeruginosa* PAO1 prompt the activation of our proposed Bacterial Adaptive Phage Response (BAPR) systems while specifically mediating differential expression of the host genome.

## PAO1 shows a BAPR response which potentially limits phage infection

The two community-focused systems for defense against phage predation that we present, PQS-mediated quorum sensing and amino-acid catabolism, appear to be examples of a new class of phage defenses. While both the PAO1 and PAK strains examined in this report lack many of the intrinsic and acquired defenses against phage infection known to be present in *Pseudomonas* spp., such as CRISPR-Cas, the potential for a communal response signaling phage predation could go a long way towards explaining the success of these systems in strains that have them. Constitutive expression of the CRISPR-Cas system in PA14 has been previously shown to carry significant fitness costs (Westra et al., 2015), possibly stemming from autoimmunity (Vercor et al., 2013), and a molecular forewarning of impending phage infection could activate CRISPR-Cas and other known systems for promoting phage resistance. Indeed Høyland-Kroghsbo et al. (2016) have previously shown expression of CRISPR-Cas transcripts to be induced by the LasR quorum sensing system in *Pseudomonas* PA14, and the ability of dying cells to send a final warning could help explain the function of that system.

Notably, overproduction of the PQS signal has also long been observed to promote autolysis, likely through the induction of prophages, in *P. aeruginosa* (D'Argenio et al., 2002) as well as *P. putida* (Fernández-Piñar et al., 2011). Indeed, the connection between lytic phage infection, intercellular signaling, and prophage induction could reflect *Pseudomonas* prophages sensing the host's call to arms and using it as a signal to escape. We have observed three prophage elements beginning, and failing, to autoinduce in response to phage infection which may be in part due to PQS warning. This connection could also help explain the notorious difficulty of isolating and maintaining pure stocks of phages when clinical or environmental strains, which often carry active prophages and have not been adapted to laboratory conditions, are used as hosts.

We have also found what may be considered as a 'Scorched Earth' strategy for reducing the vigor of phage infection, whereby an infected cell adaptively disrupts its own metabolism in such a way as to impair the success of phage infection. This would serve as a practical example for systems of 'Reduced Infection Vigor' that have been previously postulated by Hyman and Abedon (2010).

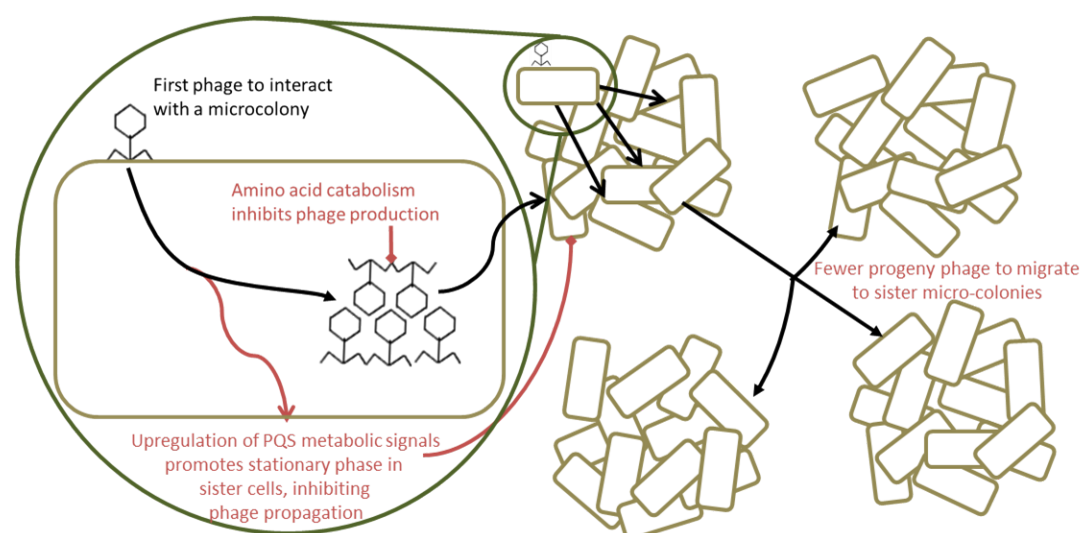

**Figure 8. Proposed models for adaptive phage resistance.** We propose that the PQS quorum sensing system promotes bacterial fitness in the presence of phage, as was found by *Moreau et al. (2017)* by warning sister cells to enter stationary phase, making them less susceptible to phage infection and suppressing phage propagation. Similarly, we propose that the non-adaptive upregulation of amino acid catabolism that we observe could function to inhibit phage propagation.

## Methods and Materials

### Strains and growth conditions

RNA sequencing of phage-infected cells was performed as described by *Chevallereau et al. (2016)* and *Blasdel et al. (2017)*. The *Pseudomonas aeruginosa* strain PAO1 was used as a host for phages LUZ19, YuA, PEV2, 14-1, and  $\Phi$ KZ. Cultures were grown to an  $OD_{600}$  0.3 ( $1.2 \times 10^8$  / mL) in Lysogeny broth (10 g/L Tryptone, 5 g/L Yeast extract, 5 g/L NaCl) and infected at a multiplicity of infection of 50 to ensure synchronous infection. *P. aeruginosa* strain PAK was used as a host for phages PAK\_P3 and PAK\_P4.

### Whole transcriptome sequencing

RNA-Sequencing was performed on four phage-negative controls taken immediately before infection. Samples were also taken from synchronized infections by phages LUZ19, YuA, PEV2, and 14-1 to represent early, middle and late transcription as described by *Blasdel et al. (2018, 2017)*. Briefly, synchronicity was controlled for by ensuring that fewer than 5% of host cells still survived before the early time point was taken. At time points after the addition of phage chosen to reflect each phase of infection, cells were immediately halted with stop solution (1%, 9% ethanol, 90% sample (*Blasdel et al., 2018*)), pelleted, and re-suspended in TRIzol to lyse cells as well as inactivate RNases and start an organic extraction. The resulting nucleic acid was digested with TURBO DNase to remove DNA, rRNA was removed with the Ribo-Zero kit, and stranded cDNA was prepared with the TruSeq Stranded mRNA Library Prep Kit ahead of sequencing.

### Differential expression analysis

After trimming, sequencing reads were aligned separately to both the phage and host genomes with the CLC Genomics workbench v7.5.1 (QIAGEN Bioinformatics, Aarhus, Denmark). Sequencing statistics and results are summarized in Supplementary Table 2. Alignments were then summarized into count tables of Total Gene Reads that map to phage or host gene features respectively. Each statistical comparison presented was performed using the DESeq2 (*Love et al., 2014*) R/Bioconductor package to normalize host transcript populations to host transcript populations, before testing for differential expression as described by *Blasdel et al. (2017)*.

The core analysis compares directional host total gene read counts for four phage negative controls sampled at a point immediately before infection to samples representing the synchronized late infections of LUZ19, YuA, PEV2 and 14-1. The DESeq2 test for the statistical significance of differential expression between the negative controls and phage-infected samples here is used to specifically highlight gene features that are differentially expressed in common between the different phage infections (See Figure 2). As the four phages used have radically different metabolisms, genome contents, and methods for coopting host mechanisms, they are unlikely to all mediate differential expression of any given host gene in the same way. Thus, any differential expression of host genes that is common to all of the independent infections is likely to be mediated by the one biological entity all of the infections have in common, the host.

### Normalization of reads between conditions

Given that there are two biological entities within the infected cell whose transcripts are sequenced together, and which change in total abundance relative to each other, meaningfully assessing differential expression for host genes becomes non-intuitively complex. Indeed, we observe a global depletion of all host transcripts relative to the total (phage and host) transcript population present in the cell due to the influx of phage transcripts (See Figure 1). Therefore, two approaches could theoretically be used to measure the change in the abundance of a host transcript during a phage infection. We could measure changes (1) relative to either only other host transcripts or (2) relative to the total transcript population in the cell, including new phage transcripts. We have here adopted the first, asking which host transcripts are up or down regulated relative to other host transcripts by normalizing host transcripts before infection to host transcripts after infection. This has the effect of artificially enriching host reads in the phage infected condition by normalizing away the influx of phage transcripts, so as to compare it to the uninfected condition as if those phage transcripts were not present. The answer to this question focuses on how the host transcripts are being being targeted for either increased transcription or decreased degradation by at least one of the two biological entities in the cell, by ignoring the replacement of host transcripts with phage transcripts.

Analyzing the change in a transcript's abundance relative to the total transcript population could not be addressed analysis of multiple phage infections, since depletion of host transcripts relative to the total happens at different rates during different phage infections. This effectively prevents us from elucidating a transcript's differential ability to compete for ribosome activity through changes relative abundance. For example, as was reported for prophage transcripts by *Blasdel et al. (2017)* during phage infection, a transcript could be targeted for increased transcription even while the stronger degradation of all non-phage transcripts reduces its abundance relative to the total transcript population in the cell.

Indeed, the differential expression results that we report will not reflect a transcript's differential ability to compete for ribosome activity through changes relative abundance. To answer this second question, we would need to ask which host transcripts are up or down regulated relative to the total transcript population in the cell, including both phage and host transcripts. F

It is important, however, that the changes in the relative abundance of host transcripts relative to other host transcripts that we are measuring in this manuscript happen independently of the global depletion of host transcripts relative to the total transcript population. Thus, even though the depletion of host transcripts relative to the total happens at different rates during different phage infections, we are still able to meaningfully test host genes for differential expression in the comparison between our phage negative controls and the combined phage-infected condition that forms our core analysis.

### Comparisons to other data sets

The gene features identified by this analysis as being differentially expressed in common between each infection (See Figure 2) were then highlighted in data published for  $\Phi$ KZ (*Ceyssens et al., 2014*)



as well as each phage examined (See Figure 3-Figure supplement 1). Orthologues to gene features in the PAO1 host response to phage infection were identified in the PAK strain by the Bi-directional Best Hit method. The differential expression identified in the core analysis was also compared to published data representing the differential expression between wild-type PAO1 and a  $\Delta$ Hfq-mutant (*Sonnleitner et al., 2006*), a  $\Delta$ GcsR- mutant (*Lundgren et al., 2013*), as well as a  $\Delta$ PqsA-mutant (*Rampioni et al., 2010*). Neither the three wild-type negative control conditions nor the three mutant conditions used by each report can be directly compared to any of the conditions used here due to the differences in expression that can be expected in bacteria growing in different labs. However, this analysis compares only the change in expression due to phage infection to the change in expression due to the absence of each gene.

## Acknowledgments

We would like to gratefully acknowledge the thoughtful critique and thoughts of Dr. Harold Brussow. We would also like to thank Dr. Kasia Dani-Włodarczyk and Maarten Boon for technical assistance in collecting RNA samples from synchronous infections and Dr. Jeroen De Smet for his assistance in interpreting his metabolomics data. B.G.B acknowledges the Onderzoeksfonds K.U. Leuven for granting a postdoctoral fellowship (3E160483). This research was also supported by grant G.0323.09 from the FWO and the KULeuven project GOA 'Phage Biosystems'.

## References

- Abedon ST**, Thomas-Abedon C. Phage therapy pharmacology. *Current pharmaceutical biotechnology*. 2010; 11(1):28–47.
- Achsel T**, Stark H, Lührmann R. The Sm domain is an ancient RNA-binding motif with oligo (U) specificity. *Proceedings of the National Academy of Sciences*. 2001; 98(7):3685–3689.
- Adams MH**, et al. Bacteriophages. *Bacteriophages*. 1959; .
- Aguiar J**, Zavala A, Diaz-Perez C, Cervantes C, Diaz-Perez A, Campos-Garcia J. The atu and liu clusters are involved in the catabolic pathways for acyclic monoterpenes and leucine in *Pseudomonas aeruginosa*. *Applied and environmental microbiology*. 2006; 72(3):2070–2079.
- Ainsworth S**, Zomer A, Mahony J, van Sinderen D. Lytic infection of *Lactococcus lactis* by bacteriophages Tuc2009 and c2 triggers alternative transcriptional host responses. *Applied and environmental microbiology*. 2013; 79(16):4786–4798.
- Arzanlou M**, Chai WC, Venter H. Intrinsic, adaptive and acquired antimicrobial resistance in Gram-negative bacteria. *Essays In Biochemistry*. 2017; 61(1):49–59.
- Berkowitz DB**, Charette BD, Karukurichi KR, McFadden JM.  $\alpha$ -Vinyl amino acids: occurrence, asymmetric synthesis, and biochemical mechanisms. *Tetrahedron: Asymmetry*. 2006; 17(6):869–882.
- Black L**, Showe M, Mathews C, Kutter E, Mosig G, Berget P. Bacteriophage T4. *American Society for Microbiology*, Washington DC. 1983; p. 219–245.
- Blanka A**, Schulz S, Eckweiler D, Franke R, Bielecka A, Nicolai T, Casilag F, Düvel J, Abraham WR, Kaever V, et al. Identification of the alternative sigma factor SigX regulon and its implications for *Pseudomonas aeruginosa* pathogenicity. *Journal of bacteriology*. 2014; 196(2):345–356.
- Blasdel B**, Ceyssens PJ, Lavigne R. Preparing cDNA Libraries from Lytic Phage-Infected Cells for Whole Transcriptome Analysis by RNA-Seq. In: *Bacteriophages* Springer; 2018.p. 185–194.
- Blasdel BG**, Chevallereau A, Monot M, Lavigne R, Debarbieux L. Comparative transcriptomics analyses reveal the conservation of an ancestral infectious strategy in two bacteriophage genera. *The ISME journal*. 2017; .
- Van den Bossche A**, Hardwick SW, Ceyssens PJ, Hendrix H, Voet M, Dendooven T, Bandyra KJ, De Maeyer M, Aertsen A, Noben JP, et al. Structural elucidation of a novel mechanism for the bacteriophage-based inhibition of the RNA degradosome. *Elife*. 2016; 5:e16413.
- Braud A**, Hannauer M, Mislin GL, Schalk IJ. The *Pseudomonas aeruginosa* pyochelin-iron uptake pathway and its metal specificity. *Journal of bacteriology*. 2009; 191(11):3517–3525.



- 440 **Brencic A**, McFarland KA, McManus HR, Castang S, Mogno I, Dove SL, Lory S. The GacS/GacA signal transduction  
441 system of *Pseudomonas aeruginosa* acts exclusively through its control over the transcription of the RsmY  
442 and RsmZ regulatory small RNAs. *Molecular microbiology*. 2009; 73(3):434–445.
- 443 **Burrows LL**. *Pseudomonas aeruginosa* twitching motility: type IV pili in action. *Annual review of microbiology*.  
444 2012; 66:493–520.
- 445 **Ceyssens PJ**. Isolation and characterization of lytic bacteriophages infecting *Pseudomonas aeruginosa*. PhD  
446 thesis, KU Leuven; 2009.
- 447 **Ceyssens PJ**, Brabban A, Rogge L, Lewis MS, Pickard D, Goulding D, Dougan G, Noben JP, Kropinski A, Kutter  
448 E, et al. Molecular and physiological analysis of three *Pseudomonas aeruginosa* phages belonging to the  
449 “N4-like viruses”. *Virology*. 2010; 405(1):26–30.
- 450 **Ceyssens PJ**, Lavigne R, Mattheus W, Chibeu A, Hertveldt K, Mast J, Robben J, Volckaert G. Genomic analysis  
451 of *Pseudomonas aeruginosa* phages LKD16 and LKA1: Establishment of the  $\phi$ KMV subgroup within the T7  
452 supergroup. *Journal of Bacteriology*. 2006; 188(19):6924–6931.
- 453 **Ceyssens PJ**, Mesyanzhinov V, Sykilinda N, Briers Y, Roucourt B, Lavigne R, Robben J, Domashin A, Miroshnikov  
454 K, Volckaert G, et al. The genome and structural proteome of YuA, a new *Pseudomonas aeruginosa* phage  
455 resembling M6. *Journal of bacteriology*. 2008; 190(4):1429–1435.
- 456 **Ceyssens PJ**, Minakhin L, Van den Bossche A, Yakunina M, Klimuk E, Blasdel B, De Smet J, Noben JP, Bläsi  
457 U, Severinov K, et al. Development of giant bacteriophage  $\phi$ KZ is independent of the host transcription  
458 apparatus. *Journal of virology*. 2014; 88(18):10501–10510.
- 459 **Ceyssens PJ**, Miroshnikov K, Mattheus W, Krylov V, Robben J, Noben JP, Vanderschraeghe S, Sykilinda N, Kropinski  
460 AM, Volckaert G, et al. Comparative analysis of the widespread and conserved PB1-like viruses infecting  
461 *Pseudomonas aeruginosa*. *Environmental microbiology*. 2009; 11(11):2874–2883.
- 462 **Chevallereau A**, Blasdel BG, De Smet J, Monot M, Zimmermann M, Kogadeeva M, Sauer U, Jorth P, Whiteley  
463 M, Debarbieux L, et al. Next-Generation “-omics” Approaches Reveal a Massive Alteration of Host RNA  
464 Metabolism during Bacteriophage Infection of *Pseudomonas aeruginosa*. *PLoS Genet*. 2016; 12(7):e1006134.
- 465 **Chibeu A**, Ceyssens PJ, Hertveldt K, Volckaert G, Cornelis P, Matthijs S, Lavigne R. The adsorption of *Pseu-*  
466 *domonas aeruginosa* bacteriophage  $\phi$ KMV is dependent on expression regulation of type IV pili genes. *FEMS*  
467 *microbiology letters*. 2009; 296(2):210–218.
- 468 **Chopin MC**, Chopin A, Bidnenko E. Phage abortive infection in lactococci: variations on a theme. *Current*  
469 *opinion in microbiology*. 2005; 8(4):473–479.
- 470 **Comolli JC**, Hauser AR, Waite L, Whitchurch CB, Mattick JS, Engel JN. *Pseudomonas aeruginosa* gene products  
471 PilT and PilU are required for cytotoxicity in vitro and virulence in a mouse model of acute pneumonia.  
472 *Infection and immunity*. 1999; 67(7):3625–3630.
- 473 **Darby C**, Cosma CL, Thomas JH, Manoil C. Lethal paralysis of *Caenorhabditis elegans* by *Pseudomonas*  
474 *aeruginosa*. *Proceedings of the National Academy of Sciences*. 1999; 96(26):15202–15207.
- 475 **D’Argenio DA**, Calfee MW, Rainey PB, Pesci EC. Autolysis and autoaggregation in *Pseudomonas aeruginosa*  
476 colony morphology mutants. *Journal of bacteriology*. 2002; 184(23):6481–6489.
- 477 **De Smet J**, Hendrix H, Blasdel BG, Danis-Wlodarczyk K, Lavigne R. *Pseudomonas* predators: understanding and  
478 exploiting phage–host interactions. *Nature Reviews Microbiology*. 2017; 15(9):nrmicro–2017.
- 479 **De Smet J**, Zimmermann M, Kogadeeva M, Ceyssens PJ, Vermaelen W, Blasdel B, Jang HB, Sauer U, Lavigne  
480 R. High coverage metabolomics analysis reveals phage-specific alterations to *Pseudomonas aeruginosa*  
481 physiology during infection. *The ISME journal*. 2016; .
- 482 **Déziel E**, Lépine F, Milot S, He J, Mindrinos MN, Tompkins RG, Rahme LG. Analysis of *Pseudomonas aeruginosa* 4-  
483 hydroxy-2-alkylquinolines (HAQs) reveals a role for 4-hydroxy-2-heptylquinoline in cell-to-cell communication.  
484 *Proceedings of the National Academy of Sciences of the United States of America*. 2004; 101(5):1339–1344.
- 485 **Diggle SP**, Matthijs S, Wright VJ, Fletcher MP, Chhabra SR, Lamont IL, Kong X, Hider RC, Cornelis P, Cámara M,  
486 et al. The *Pseudomonas aeruginosa* 4-quinolone signal molecules HHQ and PQS play multifunctional roles in  
487 quorum sensing and iron entrapment. *Chemistry & biology*. 2007; 14(1):87–96.

- 488 **Diggle SP**, Winzer K, Chhabra SR, Worrall KE, Cámara M, Williams P. The *Pseudomonas aeruginosa* quinolone  
489 signal molecule overcomes the cell density-dependency of the quorum sensing hierarchy, regulates rhl-  
490 dependent genes at the onset of stationary phase and can be produced in the absence of LasR. *Molecular*  
491 *microbiology*. 2003; 50(1):29–43.
- 492 **Doberenz S**, Eckweiler D, Reichert O, Jensen V, Bunk B, Spröer C, Kordes A, Frangipani E, Luong K, Korlach J, et al.  
493 Identification of a *Pseudomonas aeruginosa* PAO1 DNA methyltransferase, its Targets, and physiological roles.  
494 *mBio*. 2017; 8(1):e02312–16.
- 495 **Doron S**, Fedida A, Hernández-Prieto MA, Sabehi G, Karunker I, Stazic D, Feingersch R, Steglich C, Futschik M,  
496 Lindell D, et al. Transcriptome dynamics of a broad host-range cyanophage and its hosts. *The ISME journal*.  
497 2016; 10(6):1437–1455.
- 498 **Dötsch A**, Schniederjans M, Khaledi A, Hornischer K, Schulz S, Bielecka A, Eckweiler D, Pohl S, Häussler S. The  
499 *Pseudomonas aeruginosa* transcriptional landscape is shaped by environmental heterogeneity and genetic  
500 variation. *Mbio*. 2015; 6(4):e00749–15.
- 501 **Drulis-Kawa Z**, Olszak T, Danis K, Majkowska-Skrobek G, Ackermann HW. A giant *Pseudomonas* phage from  
502 Poland. *Archives of virology*. 2014; 159(3):567–572.
- 503 **Dy RL**, Przybiski R, Semeijn K, Salmond GP, Fineran PC. A widespread bacteriophage abortive infection system  
504 functions through a Type IV toxin–antitoxin mechanism. *Nucleic acids research*. 2014; 42(7):4590–4605.
- 505 **Fallico V**, Ross RP, Fitzgerald GF, McAuliffe O. Genetic response to bacteriophage infection in *Lactococcus lactis*  
506 reveals a four-strand approach involving induction of membrane stress proteins, D-alanylation of the cell wall,  
507 maintenance of proton motive force, and energy conservation. *Journal of virology*. 2011; 85(22):12032–12042.
- 508 **Franze de Fernandez M**, Eoyang L, August T. Factor fraction required for the synthesis of bacteriophage  
509 Q $\beta$ -RNA. *Nature*. 1968; 219(5154):588–590.
- 510 **Fernández-Piñar R**, Cámara M, Dubern JF, Ramos JL, Espinosa-Urgel M. The *Pseudomonas aeruginosa* quinolone  
511 quorum sensing signal alters the multicellular behaviour of *Pseudomonas putida* KT2440. *Research in*  
512 *microbiology*. 2011; 162(8):773–781.
- 513 **Forde A**, Fitzgerald GF. Bacteriophage defence systems in lactic acid bacteria. In: *Lactic Acid Bacteria: Genetics,*  
514 *Metabolism and Applications* Springer; 1999.p. 89–113.
- 515 **Forterre P**. Manipulation of cellular syntheses and the nature of viruses: the virocell concept. *Comptes Rendus*  
516 *Chimie*. 2011; 14(4):392–399.
- 517 **Forterre P**. The virocell concept and environmental microbiology. *The ISME journal*. 2013; 7(2):233.
- 518 **Gallagher LA**, Manoil C. *Pseudomonas aeruginosa* PAO1 kills *Caenorhabditis elegans* by cyanide poisoning.  
519 *Journal of Bacteriology*. 2001; 183(21):6207–6214.
- 520 **Gallagher LA**, McKnight SL, Kuznetsova MS, Pesci EC, Manoil C. Functions required for extracellular quinolone  
521 signaling by *Pseudomonas aeruginosa*. *Journal of bacteriology*. 2002; 184(23):6472–6480.
- 522 **Geissmann TA**, Touati D. Hfq, a new chaperoning role: binding to messenger RNA determines access for small  
523 RNA regulator. *The EMBO journal*. 2004; 23(2):396–405.
- 524 **Goldfarb T**, Sberro H, Weinstock E, Cohen O, Doron S, Charpak-Amikam Y, Afik S, Ofir G, Sorek R. BREX is a novel  
525 phage resistance system widespread in microbial genomes. *The EMBO journal*. 2015; 34(2):169–183.
- 526 **Goldfarb WB**, Margraf H. Cyanide production by *pseudomonas aeruginosa*. *Annals of surgery*. 1967; 165(1):104.
- 527 **Gotoh N**, Tsujimoto H, Tsuda M, Okamoto K, Nomura A, Wada T, Nakahashi M, Nishino T. Characterization of  
528 the MexC-MexD-OprJ multidrug efflux system in  $\Delta$ mexA-mexB-oprM mutants of *Pseudomonas aeruginosa*.  
529 *Antimicrobial agents and chemotherapy*. 1998; 42(8):1938–1943.
- 530 **Häussler S**, Becker T. The *pseudomonas* quinolone signal (PQS) balances life and death in *Pseudomonas*  
531 *aeruginosa* populations. *PLoS Pathog*. 2008; 4(9):e1000166.
- 532 **Holloway B**. Genetic recombination in *Pseudomonas aeruginosa*. *Microbiology*. 1955; 13(3):572–581.
- 533 **Howard-Varona C**, Roux S, Dore H, Solonenko NE, Holmfeldt K, Markillie LM, Orr G, Sullivan MB. Regulation of  
534 infection efficiency in a globally abundant marine Bacteriodes virus. *The ISME journal*. 2016; .

- 535 **Høyland-Kroghsbo NM**, Paczkowski J, Mukherjee S, Broniewski J, Westra E, Bondy-Denomy J, Bassler BL. Quo-  
536 rum sensing controls the *Pseudomonas aeruginosa* CRISPR-Cas adaptive immune system. *Proceedings of the*  
537 *National Academy of Sciences*. 2016; p. 201617415.
- 538 **Hyman P**, Abedon ST. Bacteriophage host range and bacterial resistance. *Advances in applied microbiology*.  
539 2010; 70:217–248.
- 540 **Kikuchi G**. The glycine cleavage system: composition, reaction mechanism, and physiological significance.  
541 *Molecular and cellular biochemistry*. 1973; 1(2):169–187.
- 542 **Klimuk E**, Akulenko N, Makarova KS, Ceysens PJ, Volchenkov I, Lavigne R, Severinov K. Host RNA polymerase  
543 inhibitors encoded by  $\phi$ KMV-like phages of *Pseudomonas*. *Virology*. 2013; 436(1):67–74.
- 544 **Klockgether J**, Munder A, Neugebauer J, Davenport CF, Stanke F, Larbig KD, Heeb S, Schöck U, Pohl TM,  
545 Wiehlmann L, et al. Genome diversity of *Pseudomonas aeruginosa* PAO1 laboratory strains. *Journal of*  
546 *bacteriology*. 2010; 192(4):1113–1121.
- 547 **Koerner JF**, Snustad DP. Shutoff of host macromolecular synthesis after T-even bacteriophage infection.  
548 *Microbiological Reviews*. 1979; 43:199–223.
- 549 **Kulakov LA**, Ksenzenko VN, Shlyapnikov MG, Kochetkov VV, Del Casale A, Allen CC, Larkin MJ, Ceysens PJ,  
550 Lavigne R. Genomes of “phiKMV-like viruses” of *Pseudomonas aeruginosa* contain localized single-strand  
551 interruptions. *Virology*. 2009; 391(1):1–4.
- 552 **Kutter E**, Guttman B, Carlson K. The transition from host to phage metabolism after T4 infection. *Molecular*  
553 *biology of bacteriophage*. 1994; 4:343–346.
- 554 **Lamarche MG**, Déziel E. MexEF-OprN efflux pump exports the *Pseudomonas* quinolone signal (PQS) precursor  
555 HHQ (4-hydroxy-2-heptylquinoline). *PLoS One*. 2011; 6(9):e24310.
- 556 **Lavigne R**, Lecoutere E, Wagemans J, Cenens W, Aertsen A, Schoofs L, Landuyt B, Paeshuyse J, Scheer M,  
557 Schobert M, et al. A multifaceted study of *Pseudomonas aeruginosa* shutdown by virulent podovirus LUZ19.  
558 *MBio*. 2013; 4(2):e00061–13.
- 559 **Lee X**, Azevedo MD, Armstrong DJ, Banowetz GM, Reimann C. The *Pseudomonas aeruginosa* antimetabolite L-  
560 2-amino-4-methoxy-trans-3-butenic acid inhibits growth of *Erwinia amylovora* and acts as a seed germination-  
561 arrest factor. *Environmental microbiology reports*. 2013; 5(1):83–89.
- 562 **Lee X**, Reimann C, Greub G, Sufrin J, Croxatto A. The *Pseudomonas aeruginosa* toxin L-2-amino-4-methoxy-  
563 trans-3-butenic acid inhibits growth and induces encystment in *Acanthamoeba castellanii*. *Microbes and*  
564 *Infection*. 2012; 14(3):268–272.
- 565 **Leskinen K**, Blasdel BG, Lavigne R, Skurnik M. RNA-sequencing reveals the progression of phage-host interac-  
566 tions between  $\phi$ R1-37 and *Yersinia enterocolitica*. *Viruses*. 2016; 8(4):111.
- 567 **Li J**, Mason S, Greenblatt J. Elongation factor NusG interacts with termination factor rho to regulate termination  
568 and antitermination of transcription. *Genes & development*. 1993; 7(1):161–172.
- 569 **Lindell D**, Jaffe JD, Coleman ML, Futschik ME, Axmann IM, Rector T, Kettler G, Sullivan MB, Steen R, Hess WR,  
570 et al. Genome-wide expression dynamics of a marine virus and host reveal features of co-evolution. *Nature*.  
571 2007; 449(7158):83–86.
- 572 **Liu P**. Utilization of carbohydrates by *Pseudomonas aeruginosa*. *Journal of bacteriology*. 1952; 64(6):773.
- 573 **Love MI**, Huber W, Anders S. Moderated estimation of fold change and dispersion for RNA-seq data with  
574 DESeq2. *Genome biology*. 2014; 15(12):550.
- 575 **Lundgren BR**, Thornton W, Dornan MH, Villegas-Peñaranda LR, Boddy CN, Nomura CT. Gene PA2449 is essential  
576 for glycine metabolism and pyocyanin biosynthesis in *Pseudomonas aeruginosa* PAO1. *Journal of bacteriology*.  
577 2013; 195(9):2087–2100.
- 578 **Marraffini LA**. CRISPR-Cas immunity in prokaryotes. *Nature*. 2015; 526(7571):55–61.
- 579 **Masuda N**, Sakagawa E, Ohya S, Gotoh N, Tsujimoto H, Nishino T. Substrate specificities of MexAB-OprM, MexCD-  
580 OprJ, and MexXY-oprM efflux pumps in *Pseudomonas aeruginosa*. *Antimicrobial agents and chemotherapy*.  
581 2000; 44(12):3322–3327.

- 582 **Mesyanzhinov VV**, Robben J, Grymonprez B, Kostyuchenko VA, Bourkaltseva MV, Sykilinda NN, Krylov VN,  
583 Volckaert G. The genome of bacteriophage  $\phi$ KZ of *Pseudomonas aeruginosa*. *Journal of molecular biology*.  
584 2002; 317(1):1–19.
- 585 **Miller ES**, Kutter E, Mosig G, Arisaka F, Kunisawa T, Rüger W. Bacteriophage T4 genome. *Microbiology and*  
586 *molecular biology reviews*. 2003; 67(1):86–156.
- 587 **Moreau P**, Diggle SP, Friman VP. Bacterial cell-to-cell signaling promotes the evolution of resistance to parasitic  
588 bacteriophages. *Ecology and Evolution*. 2017; 7(6):1936–1941.
- 589 **Murcia N**, Lee X, Waridel P, Maspoli A, Imker H, Chai T, Walsh C, Reimann C. The *Pseudomonas aeruginosa*  
590 antimetabolite L -2-amino-4-methoxy-trans-3-butenoic acid (AMB) is made from glutamate and two alanine  
591 residues via a thiotemplate-linked tripeptide precursor. *Frontiers in Microbiology*. 2015; 6(170).
- 592 **Nikulin A**, Stolboushina E, Perederina A, Vassilieva I, Blaesi U, Moll I, Kachalova G, Yokoyama S, Vassilyev  
593 D, Garber M, et al. Structure of *Pseudomonas aeruginosa* Hfq protein. *Acta Crystallographica Section D:*  
594 *Biological Crystallography*. 2005; 61(2):141–146.
- 595 **Palmer GC**, Jorth PA, Whiteley M. The role of two *Pseudomonas aeruginosa* anthranilate synthases in tryptophan  
596 and quorum signal production. *Microbiology*. 2013; 159(5):959–969.
- 597 **Palmer GC**, Palmer KL, Jorth PA, Whiteley M. Characterization of the *Pseudomonas aeruginosa* transcriptional  
598 response to phenylalanine and tyrosine. *Journal of bacteriology*. 2010; 192(11):2722–2728.
- 599 **Panos G**, Betsi G, Falagas M. Systematic review: are antibiotics detrimental or beneficial for the treatment  
600 of patients with *Escherichia coli* O157: H7 infection? *Alimentary pharmacology & therapeutics*. 2006;  
601 24(5):731–742.
- 602 **Payne RJ**, Jansen VA. Phage therapy: the peculiar kinetics of self-replicating pharmaceuticals. *Clinical Pharma-*  
603 *cology & Therapeutics*. 2000; 68(3):225–230.
- 604 **Persat A**, Inclan YF, Engel JN, Stone HA, Gitai Z. Type IV pili mechanochemically regulate virulence factors in  
605 *Pseudomonas aeruginosa*. *Proceedings of the National Academy of Sciences*. 2015; 112(24):7563–7568.
- 606 **Pessi G**, Haas D. Transcriptional Control of the Hydrogen Cyanide Biosynthetic Genes hcnABC by the Anaerobic  
607 Regulator ANR and the Quorum-Sensing Regulators LasR and RhIR in *Pseudomonas aeruginosa*. *Journal of*  
608 *Bacteriology*. 2000; 182(24):6940–6949.
- 609 **Pessi G**, Haas D. Dual control of hydrogen cyanide biosynthesis by the global activator GacA in *Pseudomonas*  
610 *aeruginosa* PAO1. *FEMS microbiology letters*. 2001; 200(1):73–78.
- 611 **Petersohn A**, Brigulla M, Haas S, Hoheisel JD, Völker U, Hecker M. Global analysis of the general stress response  
612 of *Bacillus subtilis*. *Journal of bacteriology*. 2001; 183(19):5617–5631.
- 613 **Poranen MM**, Ravantti JJ, Grah AM, Gupta R, Auvinen P, Bamford DH. Global changes in cellular gene expression  
614 during bacteriophage PRD1 infection. *Journal of virology*. 2006; 80(16):8081–8088.
- 615 **Rampioni G**, Pustelny C, Fletcher MP, Wright VJ, Bruce M, Rumbaugh KP, Heeb S, Cámara M, Williams P. Tran-  
616 scriptomic analysis reveals a global alkyl-quinolone-independent regulatory role for PqsE in facilitating the  
617 environmental adaptation of *Pseudomonas aeruginosa* to plant and animal hosts. *Environmental microbiol-*  
618 *ogy*. 2010; 12(6):1659–1673.
- 619 **Ravantti JJ**, Ruokoranta TM, Alapuranen AM, Bamford DH. Global transcriptional responses of *Pseudomonas*  
620 *aeruginosa* to phage PRR1 infection. *Journal of virology*. 2008; 82(5):2324–2329.
- 621 **Rohwer F**, Prangishvili D, Lindell D. Roles of viruses in the environment. *Environmental microbiology*. 2009;  
622 11(11):2771–2774.
- 623 **Sana TG**, Hachani A, Bucior I, Soscia C, Garvis S, Termine E, Engel J, Filloux A, Bleves S. The second type VI  
624 secretion system of *Pseudomonas aeruginosa* strain PAO1 is regulated by quorum sensing and Fur and  
625 modulates internalization in epithelial cells. *Journal of Biological Chemistry*. 2012; 287(32):27095–27105.
- 626 **Sarwar Z**, Lundgren BR, Grassa MT, Wang MX, Gribble M, Moffat JF, Nomura CT. GcsR, a TyrR-Like Enhancer-  
627 Binding Protein, Regulates Expression of the Glycine Cleavage System in *Pseudomonas aeruginosa* PAO1.  
628 *mSphere*. 2016; 1(2):e00020–16.

629 **Schachtele CF**, De Sain CV, Hawley LA, Anderson DL. Transcription during the development of bacteriophage  
630  $\phi$ 29: production of host-and  $\phi$ 29-specific ribonucleic acid. *Journal of virology*. 1972; 10(6):1170–1178.

631 **Schulz S**, Eckweiler D, Bielecka A, Nicolai T, Franke R, Dötsch A, Hornischer K, Bruchmann S, Düvel J, Häussler S.  
632 Elucidation of sigma factor-associated networks in *Pseudomonas aeruginosa* reveals a modular architecture  
633 with limited and function-specific crosstalk. *PLoS Pathog*. 2015; 11(3):e1004744.

634 **Snyder L**. Phage-exclusion enzymes: a bonanza of biochemical and cell biology reagents? *Molecular microbiol-*  
635 *ogy*. 1995; 15(3):415–420.

636 **Sonnleitner E**, Bläsi U. Regulation of Hfq by the RNA CrcZ in *Pseudomonas aeruginosa* carbon catabolite  
637 repression. *PLoS Genet*. 2014; 10(6):e1004440.

638 **Sonnleitner E**, Gonzalez N, Sorger-Domenigg T, Heeb S, Richter AS, Backofen R, Williams P, Hüttenhofer A,  
639 Haas D, Bläsi U. The small RNA PhrS stimulates synthesis of the *Pseudomonas aeruginosa* quinolone signal.  
640 *Molecular microbiology*. 2011; 80(4):868–885.

641 **Sonnleitner E**, Schuster M, Sorger-Domenigg T, Greenberg EP, Bläsi U. Hfq-dependent alterations of the  
642 transcriptome profile and effects on quorum sensing in *Pseudomonas aeruginosa*. *Molecular microbiology*.  
643 2006; 59(5):1542–1558.

644 **Stover C**, Pham X, Erwin A, Mizoguchi S, et al. Complete genome sequence of *Pseudomonas aeruginosa* PA01,  
645 an opportunistic pathogen. *Nature*. 2000; 406(6799):959.

646 **Swarts DC**, Jore MM, Westra ER, Zhu Y, Janssen JH, Snijders AP, Wang Y, Patel DJ, Berenguer J, Brouns SJ, et al.  
647 DNA-guided DNA interference by a prokaryotic Argonaute. *Nature*. 2014; 507(7491):258–261.

648 **Tock MR**, Dryden DT. The biology of restriction and anti-restriction. *Current opinion in microbiology*. 2005;  
649 8(4):466–472.

650 **Uzan M**. RNA processing and decay in bacteriophage T4. *Progress in molecular biology and translational*  
651 *science*. 2009; 85:43–89.

652 **Valentin-Hansen P**, Eriksen M, Udesen C. MicroReview: The bacterial Sm-like protein Hfq: a key player in RNA  
653 transactions. *Molecular microbiology*. 2004; 51(6):1525–1533.

654 **Valentini M**, Storelli N, Lapouge K. Identification of C4-Dicarboxylate Transport Systems in *Pseudomonas*  
655 *aeruginosa* PAO1. *Journal of bacteriology*. 2011; 193(17):4307–4316.

656 **Vercoe RB**, Chang JT, Dy RL, Taylor C, Gristwood T, Clulow JS, Richter C, Przybilski R, Pitman AR, Fineran PC.  
657 Cytotoxic chromosomal targeting by CRISPR/Cas systems can reshape bacterial genomes and expel or  
658 remodel pathogenicity islands. *PLoS genetics*. 2013; 9(4):e1003454.

659 **Vogel J**, Luisi BF. Hfq and its constellation of RNA. *Nature Reviews Microbiology*. 2011; 9(8):578–589.

660 **Westra ER**, van Houte S, Oyesiku-Blakemore S, Makin B, Broniewski JM, Best A, Bondy-Denomy J, Davidson A,  
661 Boots M, Buckling A. Parasite exposure drives selective evolution of constitutive versus inducible defense.  
662 *Current Biology*. 2015; 25(8):1043–1049.

663 **Wiegert T**, Homuth G, Versteeg S, Schumann W. Alkaline shock induces the *Bacillus subtilis*  $\sigma$ W regulon.  
664 *Molecular microbiology*. 2001; 41(1):59–71.

665 **Winsor GL**, Griffiths EJ, Lo R, Dhillon BK, Shay JA, Brinkman FS. Enhanced annotations and features for comparing  
666 thousands of *Pseudomonas* genomes in the *Pseudomonas* genome database. *Nucleic acids research*. 2016;  
667 44(D1):D646–D653.

668 **Winsor GL**, Lam DK, Fleming L, Lo R, Whiteside MD, Nancy YY, Hancock RE, Brinkman FS. *Pseudomonas* Genome  
669 Database: improved comparative analysis and population genomics capability for *Pseudomonas* genomes.  
670 *Nucleic acids research*. 2010; p. gkq869.

671 **Yakunina M**, Artamonova T, Borukhov S, Makarova KS, Severinov K, Minakhin L. A non-canonical multisubunit  
672 RNA polymerase encoded by a giant bacteriophage. *Nucleic acids research*. 2015; 43(21):10411–10420.



## Appendix 1

### Hfq transcripts are depleted in response to phage infection

The *Pseudomonas* Hfq peptide has been demonstrated to act as an RNA chaperone for mRNAs and sRNAs, positively and negatively modulating both abundance and function of each RNA species (Vogel and Luisi, 2011; Geissmann and Touati, 2004; Valentini et al., 2011). We have found that the host response to phage infection appears to differentially express the same gene features that Sonnleitner et al. (2006) found to be differentially expressed in a  $\Delta$ Hfq- mutant when compared to a wild type control (See Figure 1), suggesting an absence of Hfq activity. Indeed, 75% of genes that are upregulated in the  $\Delta$ Hfq- mutant are also upregulated during phage infection, while both conditions only significantly modulate 14% and 5.5% of the host gene features respectively. While the transcript encoding for Hfq is downregulated during infection by each *Pseudomonas* phage examined, including PAK\_P3 and PAK\_P4 infecting the PAK strain, the CrcZ sRNA is also just as universally rapidly depleted. CrcZ was recently demonstrated by Sonnleitner and Bläsi (2014) to titrate Hfq *in vitro* abrogating Hfq-mediated translational repression. Indeed, CrcZ appears to decoy for Hfq, competitively inhibiting each of its mRNA dependent roles (Sonnleitner and Bläsi, 2014).

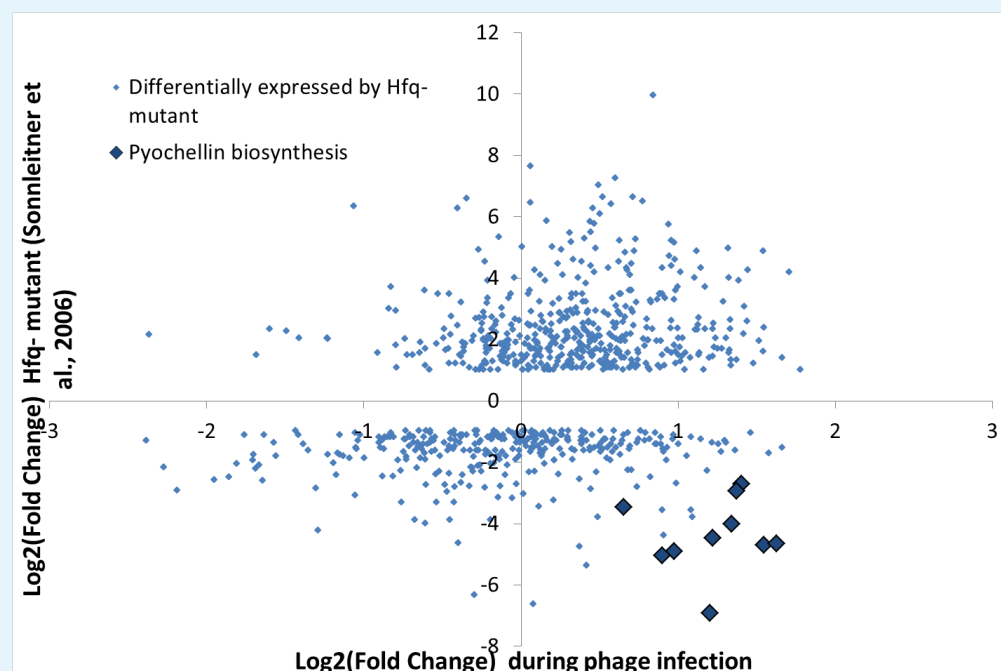

**Appendix 1 Figure 1. Gene features differentially expressed by Hfq** The gene features found by Sonnleitner et al. (2006) to be differentially expressed in a  $\Delta$ Hfq- mutant are also inversely differentially expressed after infection by *Pseudomonas* phages, indicating that phage stress infection induces Hfq activity. CrcZ is not reported as differentially expressed by Sonnleitner et al. (2006).

Within the stress response we observe the downregulation of CrcZ, which would presumably liberate Hfq activity titration mediated by this sRNA. However, we also observe the downregulation of Hfq transcripts, and the total impacts of these two effects on Hfq-regulated transcripts is similar to a  $\Delta$ Hfq- mutation. At the same time, microbiological evidence suggests that one of the many functions of Hfq may be useful as a phage defense, indeed phage 14-1 was notably observed to produce three fold more plaques on a  $\Delta$ Hfq- mutant as it does on its WT primary host. Remarkably, Hfq was first described and named as



700  
701  
702  
703  
704  
705  
  
706  
707  
708  
709  
710  
711  
712  
713  
  
714  
715  
716  
717  
718  
719  
720

the essential component of the Host Factor fraction required for plus strand synthesis from RNA phage Q $\beta$  (**Franze de Fernandez et al., 1968**), suggesting that Hfq activity may have a complex and multifactorial relationship to phage infection.

### Host stress response upregulates pyochelin biosynthesis

One puzzling feature of the host response is its upregulation of the pyochelin iron uptake pathway (*pch*ABCDEFGR), contrary to what could be expected given the inhibition of Hfq activity that is observed. Pyochelin is one of two primary siderophores secreted by *P. aeruginosa*, the other being pyoverdine, to chelate and adsorb iron (**Braud et al., 2009**). Siderophores are postulated to be involved in phage specific manipulations of the host during PAK\_P4 infection of *P. aeruginosa* PAK (**Blasdel et al., 2017**). However, we are at a loss to explain how or why pyoverdine is more weakly upregulated by the host.

### Host stress response upregulates an efflux pump system

One of the major PAO1 efflux pump systems (MexCD/OprJ) appears to be transcriptionally upregulated in response to phage infection. The MexCD/OprJ system has been demonstrated to effect the extrusion of a large number of critical antibiotics (**Gotoh et al., 1998; Masuda et al., 2000**). While it is unclear why the host is responding to phage infection with this efflux pump system, it may reflect an attempt to produce abortive infection by extruding an unknown metabolite that could be vital to some phage infections.



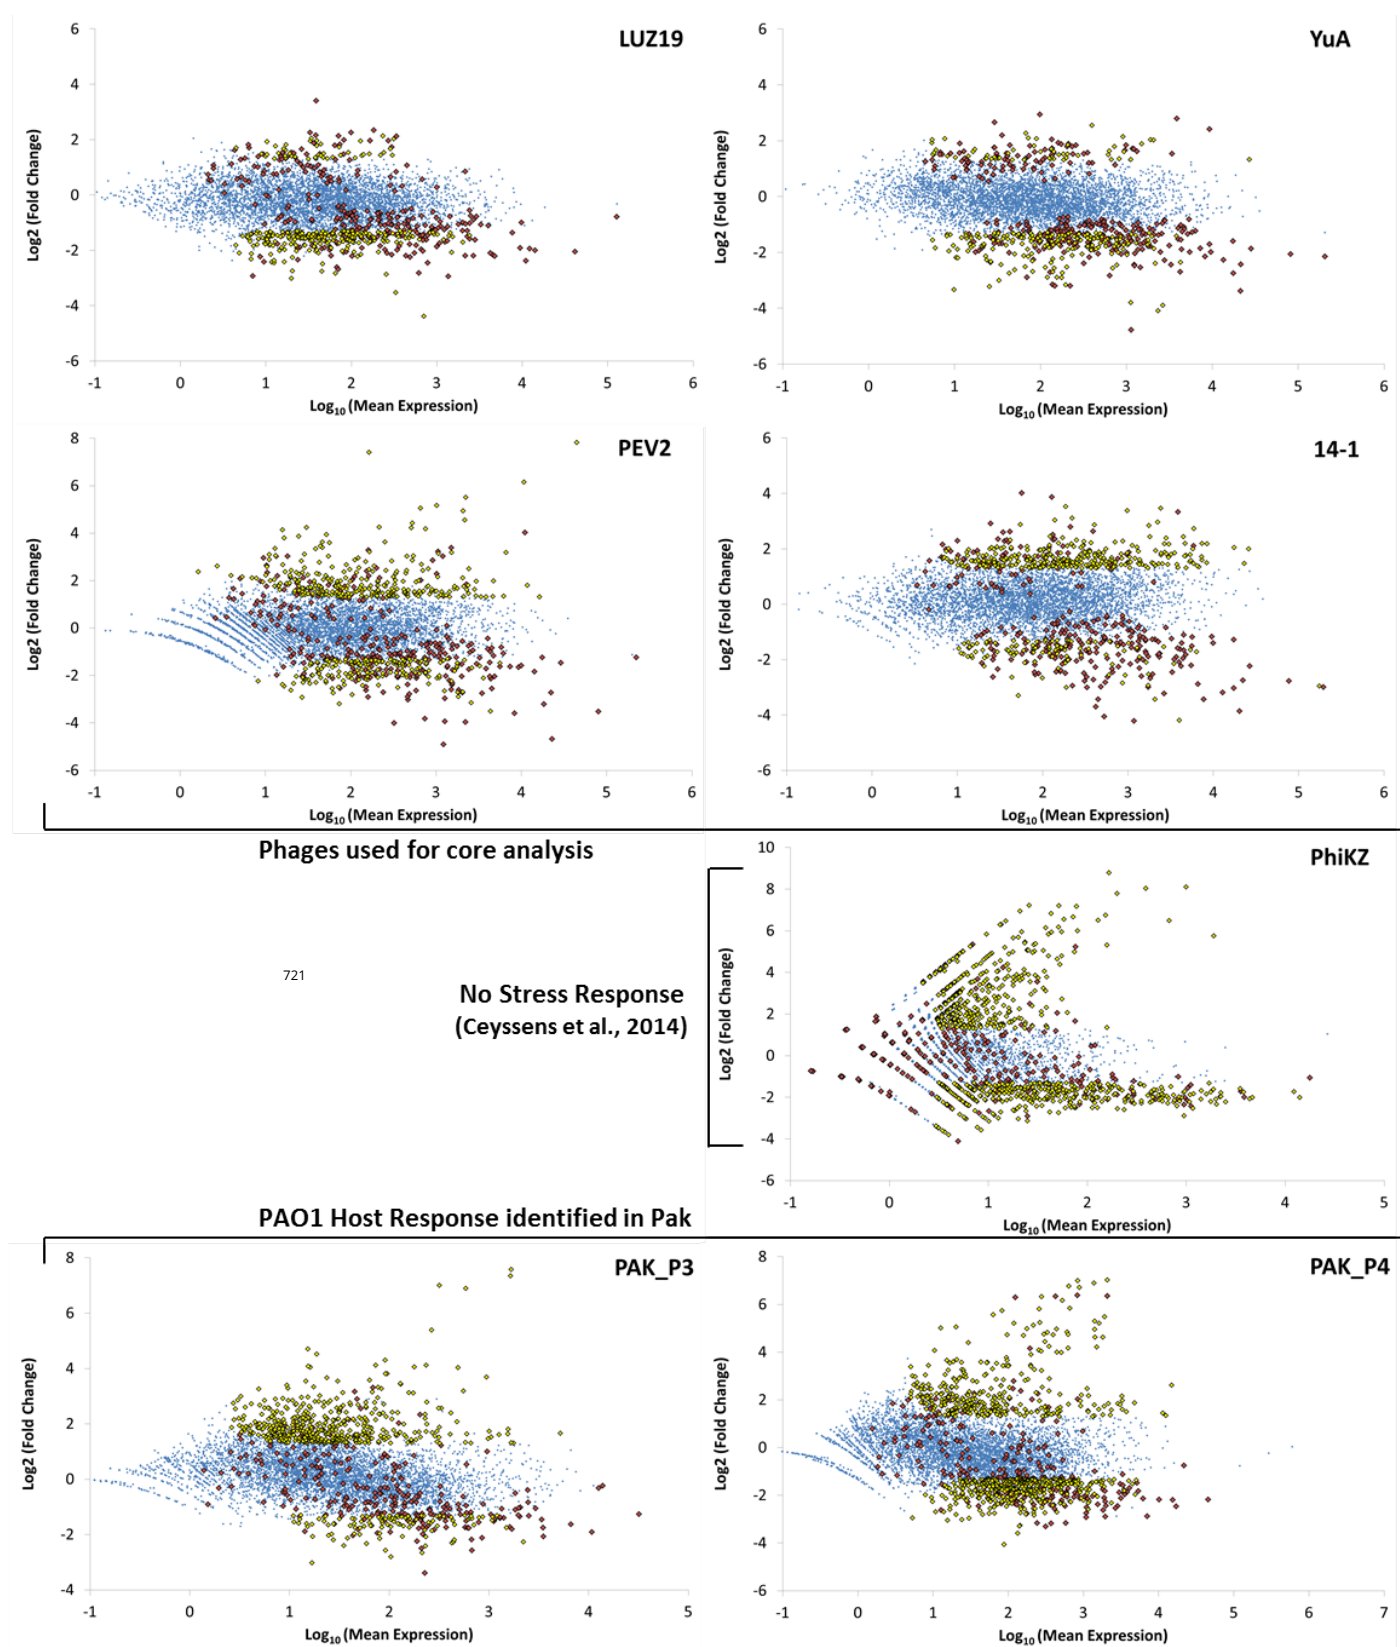

**Figure 3-Figure supplement 1. The differential expression of host genes during infection by each phage are examined here individually.** Gene features identified as differentially expressed by the putative host-mediated stress response are highlighted in each individual phage infection as red, while gene features that are differentially expressed by each phage but not the common host response are highlighted as yellow. The differential expression of the putative host-mediated stress response appears to be weaker in LUZ19 than in other phage, though this could be explained by the activity of LUZ19 gp25.1, a T7 gp2-like transcriptional inhibitor (Klimuk et al., 2013) in middle infection.
